# Supplementary material for: Comprehensive Genomic Survey, Structural Classification, and Expression Analysis of WRKY Transcription Factor Family in Rhododendron simsii
Source: MDPI journal article supplement (doi:10.3390/plants11212967), 2022-11-03
Supplement: s1 [file s1]

**Table S1.** Physicochemical properties of WRKY transcription factors in *Rhododendron simsii*.

| Gene ID         | Gene name | Length | MW        | pI    | AI    | GRAVY  | Subcellular localization |
|-----------------|-----------|--------|-----------|-------|-------|--------|--------------------------|
| Rhsim01G0033600 | RsWRKY1   | 397    | 43507.84  | 9.07  | 61.64 | -0.763 | Nucleus                  |
| Rhsim01G0241100 | RsWRKY2   | 548    | 60491.94  | 8.44  | 43.27 | -0.965 | Nucleus                  |
| Rhsim01G0268400 | RsWRKY3   | 346    | 38661.99  | 9.75  | 70.98 | -0.703 | Nucleus                  |
| Rhsim02G0002700 | RsWRKY4   | 213    | 24291.62  | 9.44  | 49.39 | -0.559 | Nucleus                  |
| Rhsim02G0146200 | RsWRKY5   | 293    | 32787.62  | 5.71  | 56.86 | -0.829 | Nucleus                  |
| Rhsim02G0213700 | RsWRKY6   | 316    | 34943.16  | 5.57  | 65.70 | -0.658 | Nucleus                  |
| Rhsim02G0213800 | RsWRKY7   | 291    | 31898.76  | 7.57  | 70.07 | -0.615 | Nucleus                  |
| Rhsim03G0153300 | RsWRKY8   | 315    | 34659.50  | 5.61  | 61.24 | -0.649 | Nucleus                  |
| Rhsim03G0192300 | RsWRKY9   | 365    | 39330.27  | 4.94  | 58.85 | -0.673 | Nucleus                  |
| Rhsim03G0198800 | RsWRKY10  | 382    | 41873.23  | 5.96  | 55.45 | -0.757 | Nucleus                  |
| Rhsim04G0007000 | RsWRKY11  | 669    | 72732.2   | 5.8   | 53.41 | -0.786 | Nucleus                  |
| Rhsim04G0015000 | RsWRKY12  | 579    | 62823.53  | 6.61  | 54.39 | -0.709 | Nucleus                  |
| Rhsim04G0052400 | RsWRKY13  | 578    | 62485.31  | 6.54  | 62.23 | -0.751 | Nucleus                  |
| Rhsim04G0158500 | RsWRKY14  | 292    | 32519.94  | 5.18  | 60.79 | -0.796 | Nucleus                  |
| Rhsim04G0240600 | RsWRKY15  | 328    | 36685.79  | 6.19  | 46.62 | -0.890 | Nucleus                  |
| Rhsim05G0168200 | RsWRKY16  | 545    | 59270.62  | 8.45  | 56.95 | -0.743 | Nucleus                  |
| Rhsim05G0226500 | RsWRKY17  | 351    | 39397.12  | 8.62  | 39.74 | -1.162 | Nucleus                  |
| Rhsim05G0231400 | RsWRKY18  | 330    | 36624.38  | 5.93  | 62.88 | -0.735 | Nucleus                  |
| Rhsim05G0231500 | RsWRKY19  | 410    | 45369.44  | 6.41  | 63.24 | -0.687 | Nucleus                  |
| Rhsim06G0054700 | RsWRKY20  | 331    | 36187.15  | 9.73  | 67.49 | -0.539 | Nucleus                  |
| Rhsim06G0156700 | RsWRKY21  | 429    | 46482.07  | 8.36  | 56.34 | -0.708 | Nucleus                  |
| Rhsim06G0164400 | RsWRKY22  | 540    | 58808.43  | 6.52  | 59.57 | -0.684 | Nucleus                  |
| Rhsim06G0174100 | RsWRKY23  | 476    | 52130.14  | 6.61  | 54.89 | -1.038 | Nucleus                  |
| Rhsim06G0220000 | RsWRKY24  | 478    | 52563.86  | 8.03  | 63.7  | -0.656 | Nucleus                  |
| Rhsim06G0226600 | RsWRKY25  | 681    | 74141.16  | 6.31  | 65.87 | -0.638 | Nucleus                  |
| Rhsim06G0235700 | RsWRKY26  | 716    | 77801.64  | 6.04  | 58.59 | -0.775 | Nucleus                  |
| Rhsim07G0005900 | RsWRKY27  | 327    | 36699.90  | 5.34  | 59.36 | -0.603 | Nucleus                  |
| Rhsim07G0009800 | RsWRKY28  | 223    | 25194.37  | 7.69  | 62.11 | -0.770 | Nucleus                  |
| Rhsim07G0010600 | RsWRKY29  | 325    | 36112.15  | 5.61  | 53.14 | -0.821 | Nucleus                  |
| Rhsim07G0037500 | RsWRKY30  | 125    | 14916.85  | 9.61  | 45.84 | -1.154 | Nucleus                  |
| Rhsim07G0083100 | RsWRKY31  | 351    | 39662.88  | 5.89  | 57.49 | -0.827 | Nucleus                  |
| Rhsim07G0087300 | RsWRKY32  | 129    | 14325.20  | 10.12 | 57.44 | -0.858 | Nucleus                  |
| Rhsim07G0225700 | RsWRKY33  | 343    | 37245.96  | 9.25  | 65.07 | -0.535 | Nucleus                  |
| Rhsim08G0072700 | RsWRKY34  | 557    | 61388.34  | 6.59  | 61.42 | -0.733 | Nucleus                  |
| Rhsim08G0098300 | RsWRKY35  | 368    | 40581.11  | 9.36  | 71.30 | -0.468 | Nucleus                  |
| Rhsim08G0158800 | RsWRKY36  | 559    | 60642.98  | 5.94  | 61.48 | -0.721 | Nucleus                  |
| Rhsim08G0205900 | RsWRKY37  | 330    | 36437.58  | 8.44  | 64.70 | -0.795 | Nucleus                  |
| Rhsim10G0005100 | RsWRKY38  | 176    | 20136.78  | 9.58  | 57.50 | -0.812 | Nucleus                  |
| Rhsim10G0147700 | RsWRKY39  | 264    | 29901.62  | 8.68  | 58.37 | -0.690 | Nucleus                  |
| Rhsim10G0148600 | RsWRKY40  | 115    | 12866.11  | 5.45  | 50.09 | -0.972 | Nucleus                  |
| Rhsim11G0062500 | RsWRKY41  | 227    | 25450.47  | 6.75  | 66.65 | -0.671 | Nucleus                  |
| Rhsim11G0064200 | RsWRKY42  | 214    | 24134.05  | 9.59  | 65.19 | -0.857 | Nucleus                  |
| Rhsim11G0120500 | RsWRKY43  | 1661   | 190287.09 | 5.92  | 88.49 | -0.318 | Nucleus                  |
| Rhsim12G0007700 | RsWRKY44  | 325    | 36659.89  | 6.94  | 41.72 | -1.149 | Nucleus                  |
| Rhsim12G0077700 | RsWRKY45  | 535    | 57646.36  | 6.61  | 53.83 | -0.813 | Nucleus                  |
| Rhsim12G0094500 | RsWRKY46  | 184    | 20827.28  | 9.52  | 50.82 | -0.877 | Nucleus                  |
| Rhsim12G0134800 | RsWRKY47  | 471    | 51888.61  | 8.77  | 55.97 | -0.739 | Nucleus                  |
| Rhsim12G0187400 | RsWRKY48  | 331    | 36676.08  | 8.69  | 63.63 | -0.759 | Nucleus                  |

|                 |          |     |          |      |       |        |         |
|-----------------|----------|-----|----------|------|-------|--------|---------|
| Rhsim13G0003300 | RsWRKY49 | 333 | 37017.52 | 6.60 | 61.23 | -0.648 | Nucleus |
| Rhsim13G0061600 | RsWRKY50 | 353 | 39625.09 | 9.76 | 66.54 | -0.747 | Nucleus |
| Rhsim13G0063200 | RsWRKY51 | 562 | 61647.22 | 7.66 | 47.21 | -0.932 | Nucleus |
| Rhsim13G0125600 | RsWRKY52 | 484 | 52564.64 | 5.28 | 51.61 | -0.892 | Nucleus |
| Rhsim13G0151900 | RsWRKY53 | 583 | 62994.81 | 6.58 | 59.18 | -0.668 | Nucleus |
| Rhsim13G0187900 | RsWRKY54 | 271 | 29959.99 | 5.45 | 49.63 | -0.820 | Nucleus |
| RhsimUnG0056300 | RsWRKY55 | 513 | 55840.93 | 6.62 | 63.22 | -0.668 | Nucleus |
| RhsimUnG0080500 | RsWRKY56 | 547 | 63550.07 | 5.59 | 94.42 | -0.290 | Nucleus |
| RhsimUnG0083000 | RsWRKY57 | 268 | 30899.98 | 5.33 | 54.59 | -0.759 | Nucleus |

**Table S2.** Primers of the *RsWRKY* genes for qRT-PCR

| Gene            | Primer name | Primer sequences (5'-3') |
|-----------------|-------------|--------------------------|
| <i>RsWRKY2</i>  | RsWRKY2-qF  | GAGGGAACCAAGAGTTGTAGTC   |
|                 | RsWRKY2-qR  | GACGACCTTCTGCCCATATT     |
| <i>RsWRKY3</i>  | RsWRKY3-qF  | GAGTGTAGCCTGAGAGTTGTAAG  |
|                 | RsWRKY3-qR  | CCTCTCCTGTTTCCACCATTAT   |
| <i>RsWRKY17</i> | RsWRKY17-qF | ATGCACGTACCCGAATTGT      |
|                 | RsWRKY17-qR | TGGTTGTGGCTGCCTTTAT      |
| <i>RsWRKY47</i> | RsWRKY47-qF | CCGAAGATCCCACCATAGTAATC  |
|                 | RsWRKY47-qR | AGCAGTGATCAGTCCAACAC     |
| <i>RsWRKY48</i> | RsWRKY48-qF | AACCCTTGTCCAAGAGCTTAC    |
|                 | RsWRKY48-qR | GTGGTTGTGCTCTCCTTCAT     |
| <i>RsWRKY49</i> | RsWRKY49-qF | TGTGAAGAAGAGAGTGGAGAGA   |
|                 | RsWRKY49-qR | AGTTGGCTGTGATGGGTATG     |
| <i>RsWRKY50</i> | RsWRKY50-qF | GGCTCTTCTGACCAGATTCTC    |
|                 | RsWRKY50-qR | CGACCACTACTCCACATTTTC    |
| <i>RsWRKY51</i> | RsWRKY51-qF | CAGCGGTAACCACTCCATAAA    |
|                 | RsWRKY51-qR | GAAGACTGGTGGTGGAACATAG   |
| <i>RsWRKY55</i> | RsWRKY55-qF | GAATCAGCGAAAGCCGAAATG    |
|                 | RsWRKY55-qR | GCATATGGAGGGATCGGTAATC   |
| <i>GAPDH</i>    | GAPDH-qF    | GTTCTGCCAGCGCTTAATGG     |
|                 | GAPDH-qR    | GCCTTCTCAAGCCTCACAGT     |
